# Supplementary material
Source: publisher site journal article supplement (https://www.kjim.org/upload/media/kjim-2020-561-suppl6.pdf)
Supplement: Supplementary file 1 [file kjim-2020-561-suppl6.pdf]

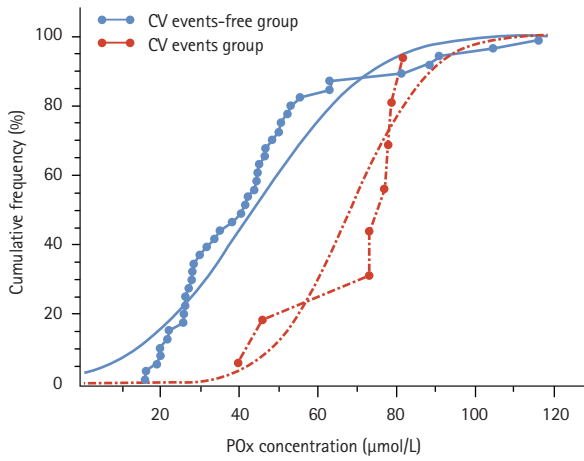

**Supplementary Figure 3.** Cumulative frequency distribution of plasma oxalic acid (POx) concentration. CV, cardiovascular.
